# Supplementary material for: Improved detection rates and treatment planning of head and neck cancer using dual-layer spectral CT
Source: Springer Nature journal article supplement (doi:10.1007/s00330-018-5511-2), 2018-05-28
Supplement: MOESM1 [file 15797332]

Supplementary Material

**Supplementary Table 1**

| No. | Age (y) | Sex | Tumor (Location) | kV | mAs | CTDIvol (mGy) |
| --- | --- | --- | --- | --- | --- | --- |
| 1 | 91 | F | Primary SCC (tongue) | 120 | 80 | 7.2 |
| 2 | 91 | M | Primary SCC (tongue) | 120 | 80 | 7.2 |
| 3 | 30 | M | Primary SCC (tongue) | 120 | 80 | 7.3 |
| 4 | 53 | M | Primary SCC (floor of mouth) | 120 | 80 | 8.5 |
| 5 | 58 | F | Primary SCC (tongue/floor of mouth) | 120 | 80 | 7.2 |
| 6 | 65 | M | Primary SCC (inner cheek) | 120 | 80 | 9.4 |
| 7 | 47 | F | Recurrent SCC (floor of mouth) | 120 | 80 | 7.5 |
| 8 | 68 | M | Recurrent SCC (floor of mouth) | 120 | 80 | 9.8 |
| 9 | 61 | F | Recurrent SCC (floor of mouth) | 120 | 80 | 7.4 |
| 10 | 52 | M | Primary SCC (tongue/floor of mouth) | 120 | 80 | 7.2 |
| 11 | 81 | M | Recurrent SCC (floor of mouth) | 120 | 80 | 8.2 |
| 12 | 58 | F | Primary SCC (floor of mouth) | 120 | 80 | 7.5 |
| 13 | 49 | M | Recurrent SCC (floor of mouth) | 120 | 80 | 7.1 |
| 14 | 67 | M | Primary SCC (mandible) | 120 | 80 | 7.5 |
| 15 | 89 | F | Primary SCC (inner cheek) | 120 | 80 | 7.3 |
| 16 | 66 | F | Recurrent ACC (palate) | 120 | 80 | 8.4 |
| 17 | 61 | M | Recurrent SCC (palate) | 120 | 80 | 7.5 |
| 18 | 51 | M | Primary SCC (mandible) | 120 | 80 | 9.2 |
| 19 | 32 | M | Primary SCC (tongue/floor of mouth) | 120 | 80 | 7.3 |
| 20 | 73 | M | Primary SCC (palate) | 120 | 80 | 7.5 |
| 21 | 60 | M | Primary SCC (tongue) | 120 | 80 | 7.3 |
| 22 | 57 | M | Primary SCC (floor of mouth) | 120 | 80 | 7.1 |
| 23 | 57 | F | Primary SCC (tongue) | 120 | 80 | 8.4 |
| 24 | 96 | M | Primary SCC (maxilla) | 120 | 80 | 7.5 |
| 25 | 55 | F | Primary SCC (mandible) | 120 | 80 | 7.1 |
| 26 | 60 | F | Primary SCC (mandible) | 120 | 80 | 9.2 |
| 27 | 80 | F | Primary SCC (mandible) | 120 | 80 | 7.4 |
| 28 | 69 | M | Primary SCC (tonsil) | 120 | 80 | 7.2 |
| 29 | 68 | M | Primary SCC (tonsil) | 120 | 80 | 7.6 |
| 30 | 76 | M | Primary SCC (maxilla) | 120 | 80 | 8.2 |
| 31 | 54 | F | Recurrent SCC (mandible) | 120 | 80 | 7.6 |
| 32 | 77 | F | Primary SCC (tongue) | 120 | 80 | 7.2 |
| 33 | 82 | M | Primary SCC (mandible) | 120 | 80 | 7.4 |
| 34 | 91 | M | Primary SCC (tongue) | 120 | 80 | 8.2 |
| 35 | 76 | F | Primary SCC (mandible) | 120 | 80 | 7.1 |
| 36 | 61 | M | Primary SCC (tongue) | 120 | 80 | 8.5 |
| 37 | 60 | F | Primary SCC (tongue) | 120 | 80 | 7.3 |
| 38 | 59 | M | Primary SCC (tongue) | 120 | 80 | 7.4 |
| 39 | 69 | F | Primary ACC (tongue) | 120 | 80 | 7.3 |

39 patients with histopathologically proven HNC were included in the study. The table lists patient (age, sex, tumor entity, tumor location) and CT image acquisition (kV, mAs, and CTDIvol values) specific data.

**
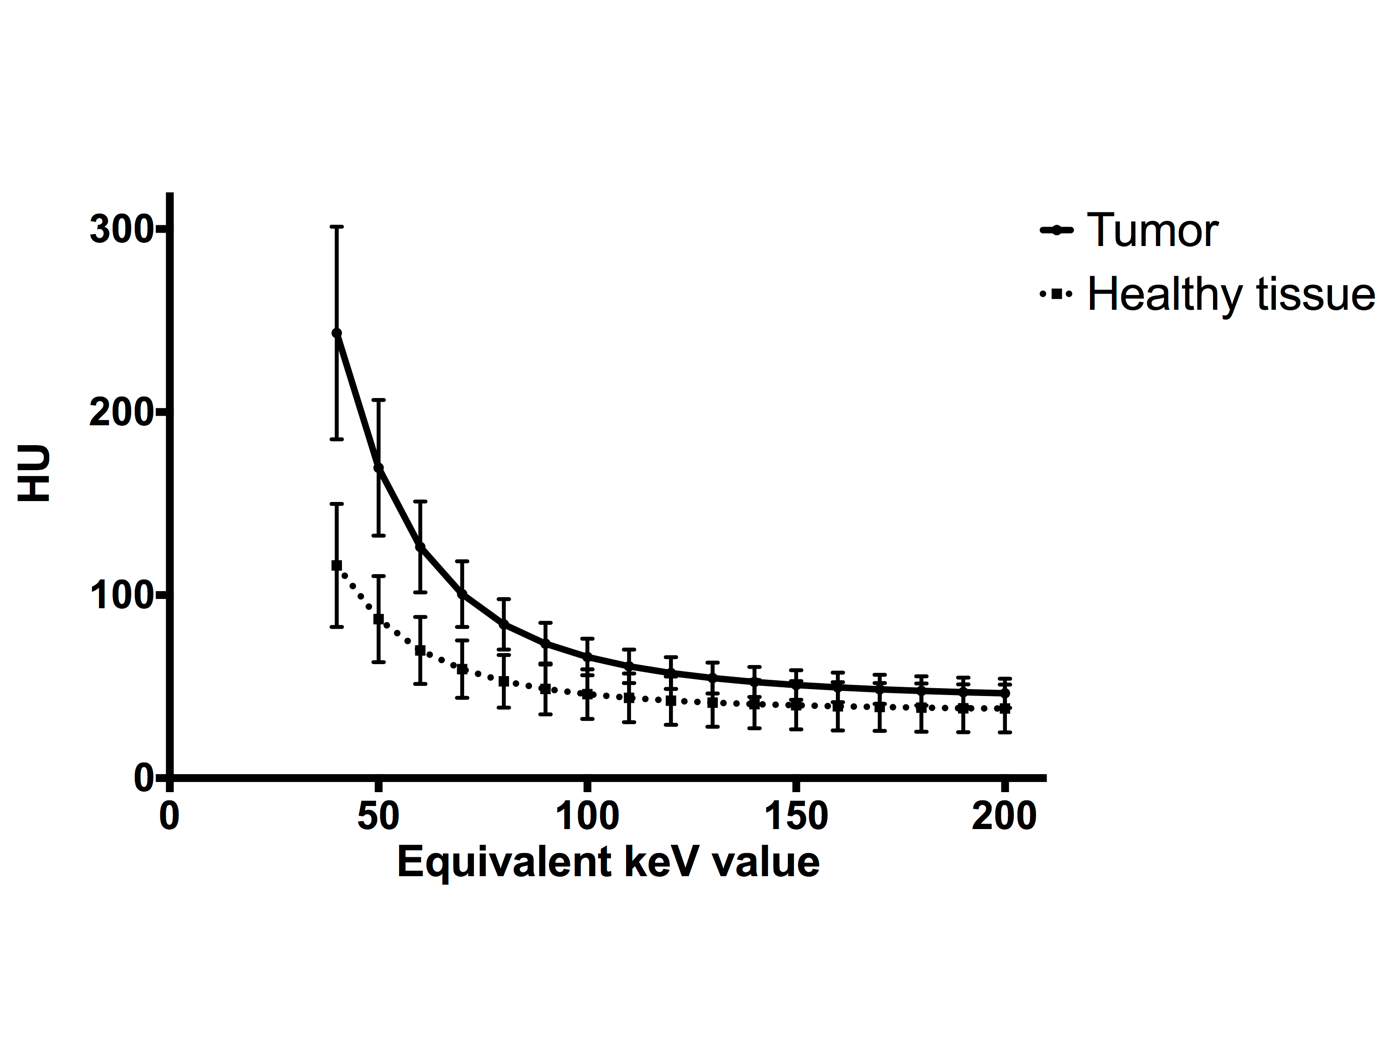
**

**Supplementary Figure 1:**

Attenuation plot showing relation of attenuation and equivalent keV value. The mean HU-values of tumor and healthy tissue of all 39 patients are shown for monoenergetic reconstructions in a range between 40keV and 200keV equivalent at 10keV increments. The greatest difference/contrast between the tumor and its surrounding tissue is noted at 40 keV.


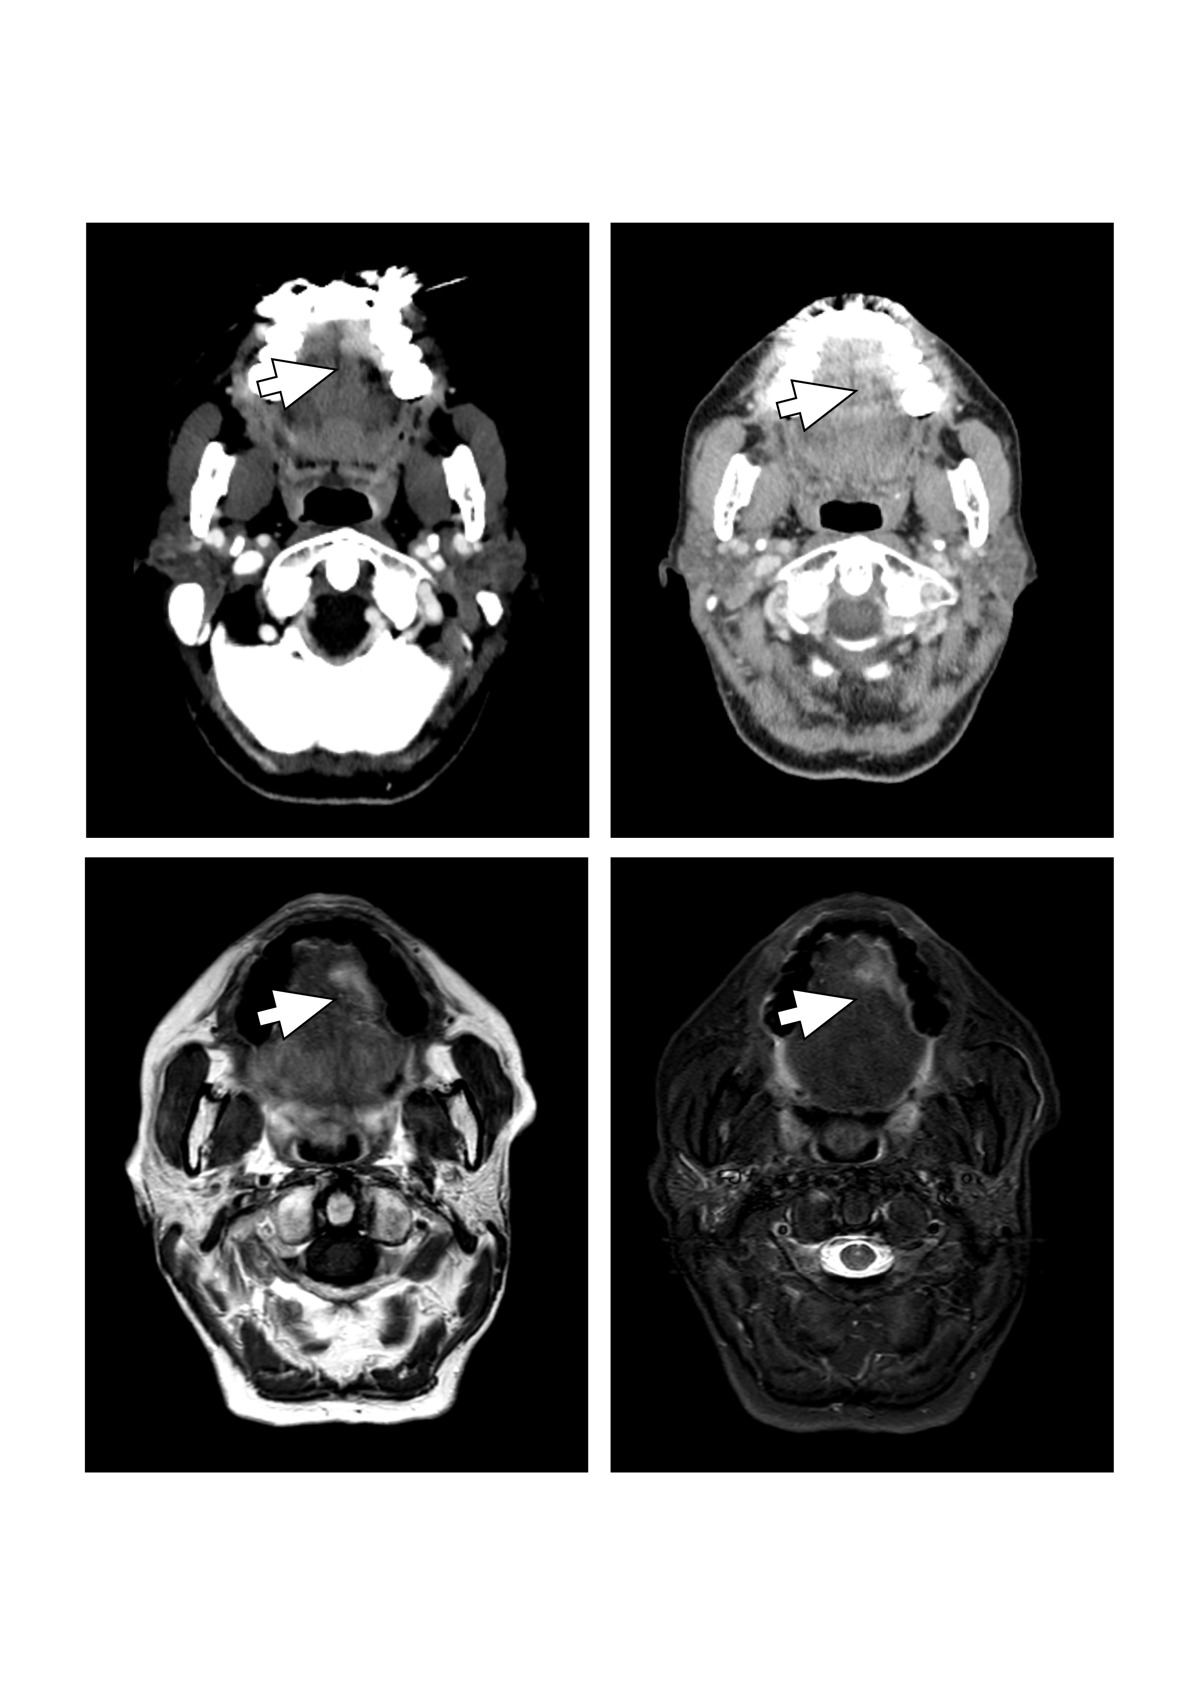


**Supplementary Figure 2**:

Tumor margins were visualized in *MonoE40* (top left), conventional CT (top right), T1w CE (bottom left) and STIR (bottom right). *MonoE40* was deemed to be superior to conventional CT and comparable to MRI by observers. Window settings (level/width): 50/350 for conventional CT, 250/350 for *MonoE40*.


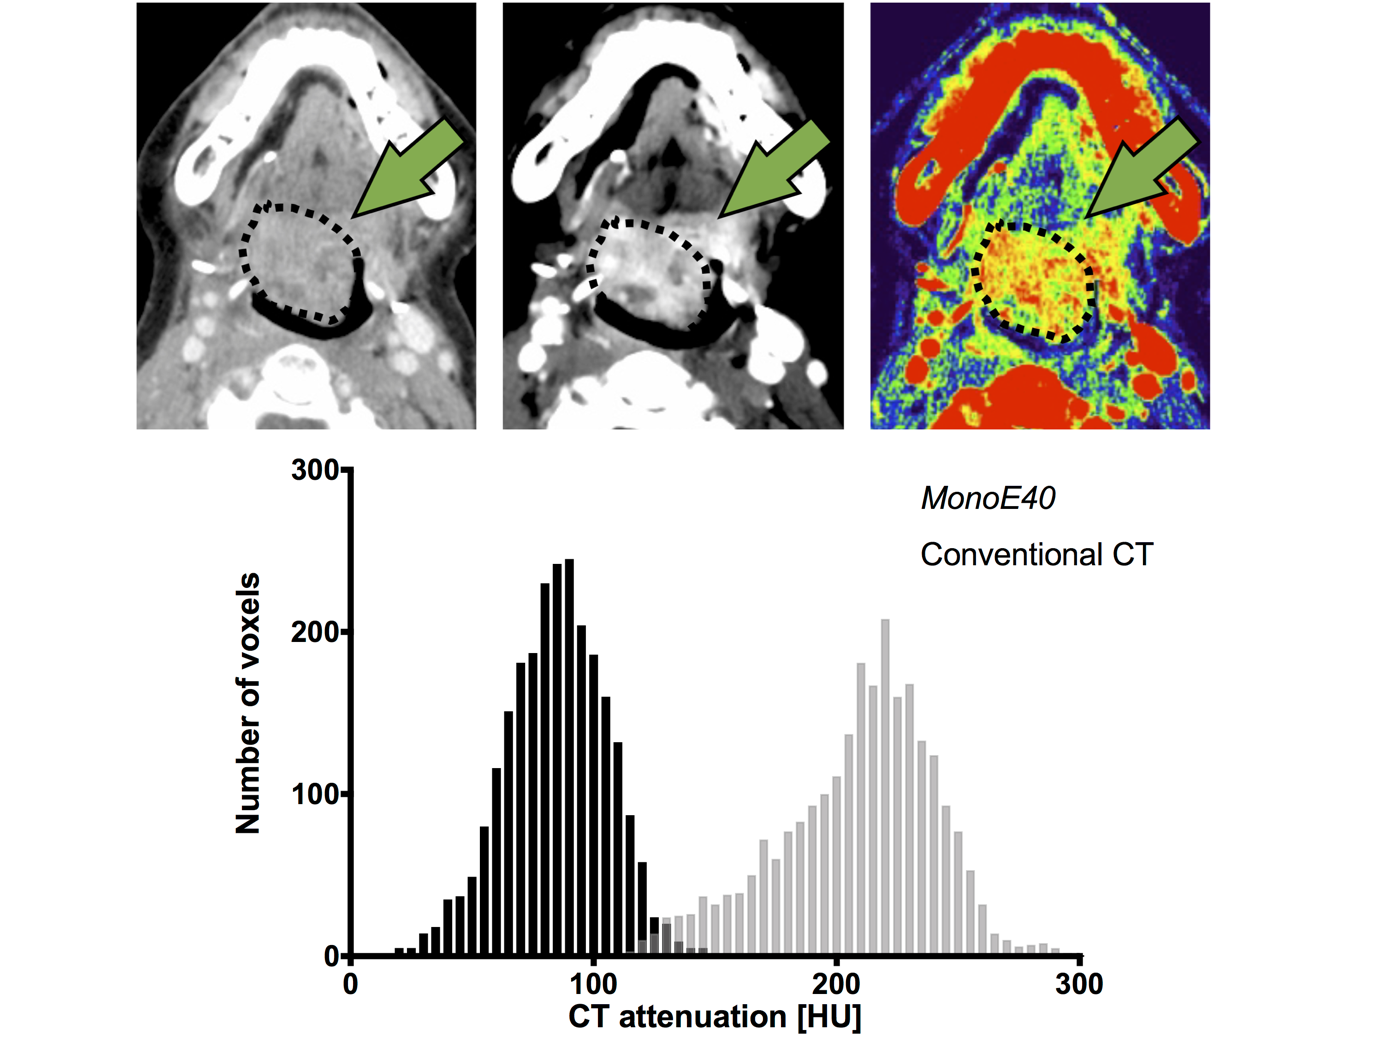


**Supplementary Figure 3:**

Conventional CT (top, left), *MonoE40* (top, center) and “iodine map” (top, right) of a heterogeneous tumor. Heterogeneity is better visualized in *MonoE40* and the “iodine map”. Histograms of the tumor region in *MonoE40* (gray) and conventional (black) reconstructions show lower kurtosis in *MonoE40* images (0.74 vs. 1.3), better demonstrating heterogeneity in pixel distribution and thus, intra-tumoral heterogeneity. Window settings (level/width): 50/350 for conventional CT, 250/350 for *MonoE40*.
